# Supplementary material for: Arctigenin Inhibits Glioblastoma Proliferation through the AKT/mTOR Pathway and Induces Autophagy
Source: Hindawi journal article supplement (doi:10.1155/2020/3542613), 2020-01-01
Supplement: f1 [file 3542613.f1.pdf]

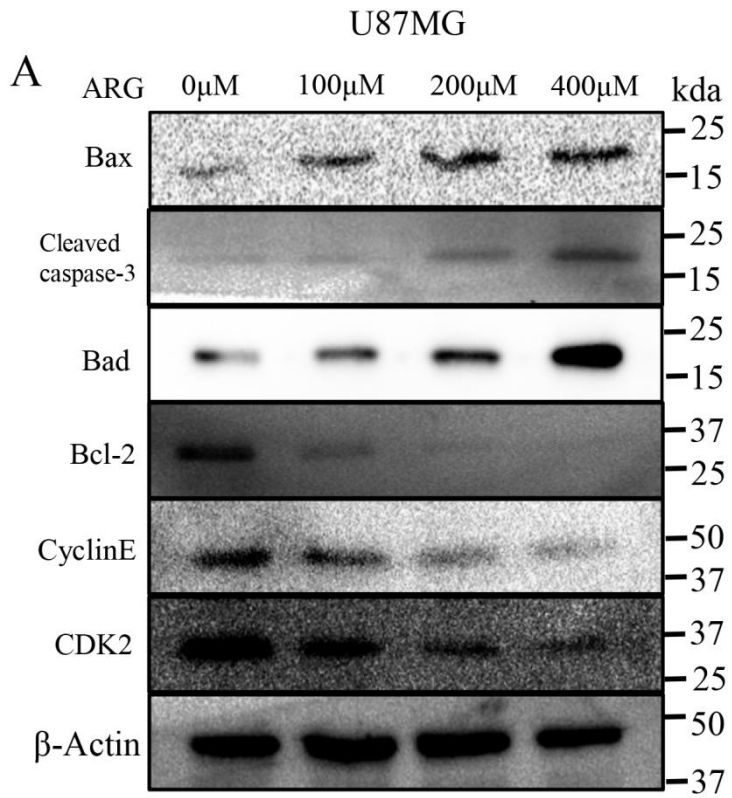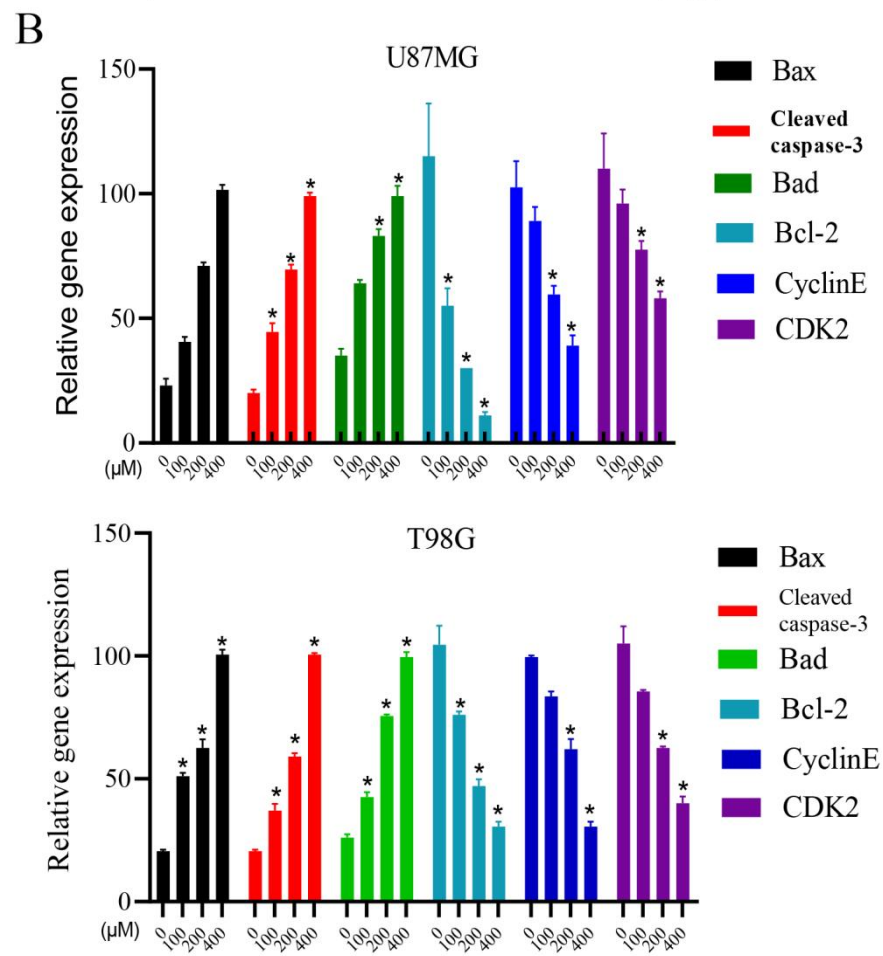

**Additional file 1,Figure S1:(A)**Glioma cells(U87MG) treated with different concentrations ARG for 48h, and western blot of apoptosis protein(Bax,Cleaved caspase-3,Bad,Bcl-2),and cell cycle protein (CyclinE,CDK2).  $\beta$ -actin acted as housekeeping protein.**(B)** statistical analysis of protein level by the image J software. Data are expressed as the mean  $\pm$  standard deviation.\*P<0.05 vs the control group. All experiments were repeated three times.

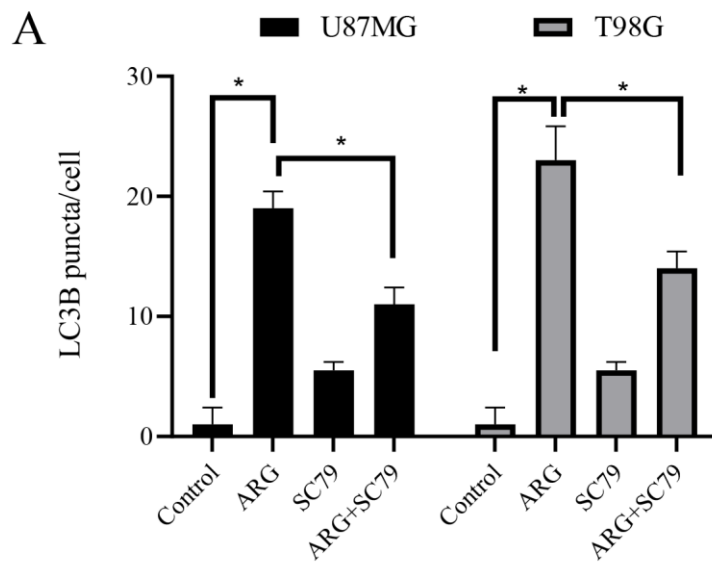

**Additional file 2,Figure S2(A)** statistical analysis of LC3B-GFP puncta per cell, Data are expressed as the mean  $\pm$  standard deviation.\*P<0.05 vs the control group. All experiments were repeated three times.
